# Supplementary material for: Pravastatin But Not Simvastatin Improves Survival and Neurofunctional Outcome After Cardiac Arrest and Cardiopulmonary Resuscitation
Source: PubMed Central journal article supplement — JACC Basic Transl Sci. 2017 Apr 12;2(2):149–59. doi: 10.1016/j.jacbts.2017.01.009 (PMC6113548; doi:10.1016/j.jacbts.2017.01.009), 2017-04-12
Supplement: mmc1.pdf [file mmc1.pdf]

## Supplemental Methods

**Western blot analysis and quantification of pulmonary COX2-expression.** Snap frozen lung tissue (30 mg) or endothelial cells were lysed and Western blotting performed employing either anti-mouse COX2 (C-20, 1:200, Santa Cruz, Santa Cruz, CA, USA) and anti- $\beta$ -Actin (A5441, 1:20.000, Sigma Aldrich) or anti-human COX2 (AF4198, R&D Systems, Minneapolis, MN) or GAPDH (R&D Systems) antibodies. Quantitative analysis of COX2 expression was performed densitometrically. All signals were normalized to the  $\beta$ -Actin signal of the corresponding sample. Tumor necrosis factor (TNF) $\alpha$  (R&D Systems) was employed at 10ng/mL.

**In vitro pulmonary endothelial cell migration.**  $1 \times 10^4$  human pulmonary microvascular endothelial cells (HPMECs, PromoCell, Heidelberg, Germany) were grown on 12-well cell-culture dishes until confluency. Employing a pipette tip, endothelial monolayers were wounded horizontally and vertically as described previously (Wagner NM et al., Arterioscler Thromb Vasc Biol, 2013) and incubated in the presence of either simvastatin or pravastatin or vehicle control. Pictures from scratch-crosses were taken immediately and following 8 hours of incubation. Cell-free area was quantified employing ImageProPlus and GraphPadPrism 6.0 software.

**In vitro pulmonary endothelial cell capillary formation.**  $1 \times 10^4$  endothelial cells were seeded in duplicate on growth factor reduced Matrigel™ (BD Bioscience, San Jose, CA) in a 96-well format and incubated in the presence of either statins or vehicles as described previously (8). Experiments were performed in duplicate and averaged per independent experiment. Following 8 hours of incubation, pictures were taken from 4 random fields per well and tube length was determined employing Image Pro Plus software.

**Endothelial cell apoptosis and necrosis.** Following incubation with either statin or vehicle for 24 hours, pulmonary endothelial cells were detached, washed and resuspended at  $1 \times 10^6$  cells per mL. Volumes of 100  $\mu$ L cell suspension were incubated with reagents of the BD AnnexinV: FITC Apoptosis Detection Kit I according to manufacturer's instructions and analyzed employing a Becton Dickinson flow cytometer (Bedford, MA, USA).

**Supplemental Figure 1 Plasma cholesterol concentration and relative bodyweight in response to intravenous statin treatment.**

**A, B** Cholesterol plasma levels in mice following one week of statin treatment. Mean±SD, \*P<0.05 vs. baseline; n=7 mice, analysis by Kolmogorov-Smirnov test for normal distribution, paired t-test, mean±SD. **C, D** Bodyweight during one week of statin treatment. \*P<0.05 pravastatin vs. saline, #P<0.05 simvastatin vs. lipid emulsion, analysis by Kolmogorov-Smirnov test for normal distribution, repeated measures ANOVA, mean±SD.

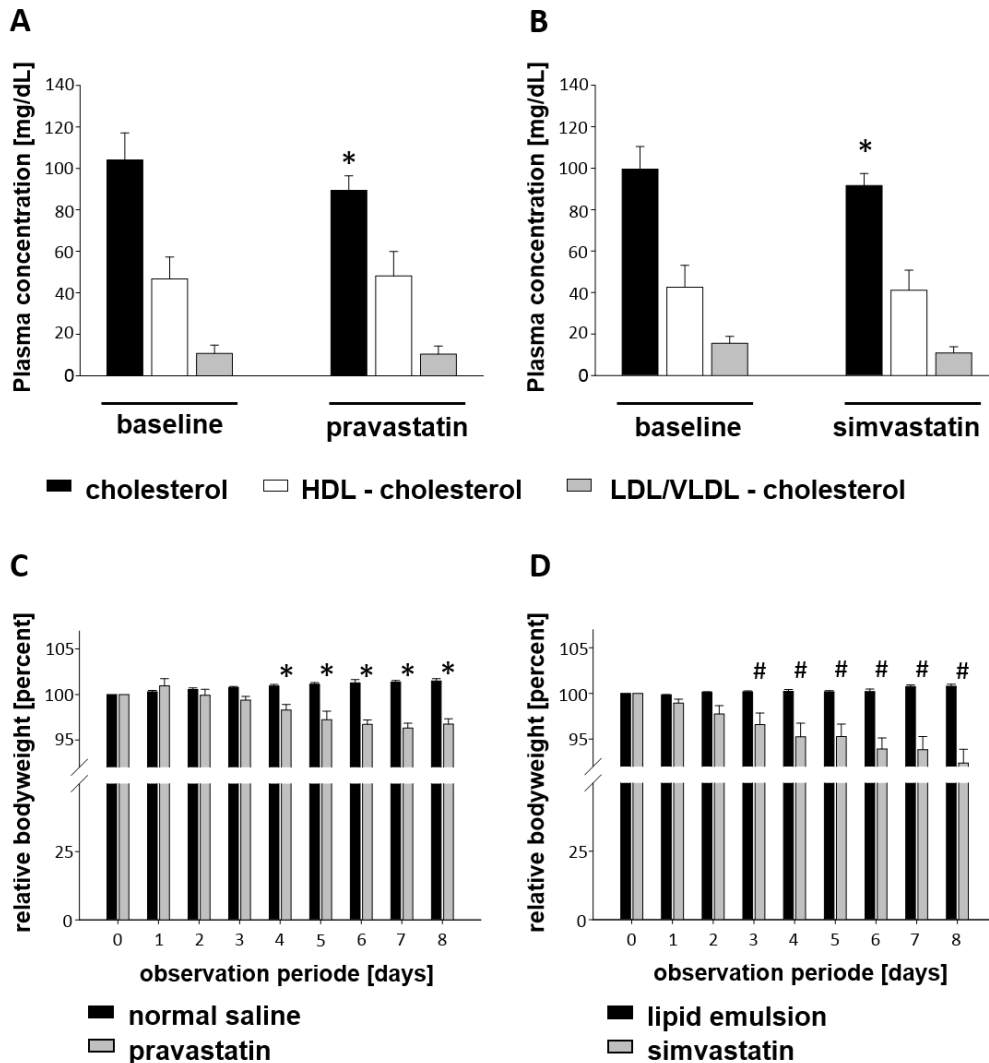

**Supplemental Figure 2 Pravastatin augments and simvastatin impairs endothelial cell capillary formation *in vitro*.**

**A, C** Capillary tube formation on Matrigel after 8h in the presence of pravastatin. \*P<0.05, \*\*\*P<0.001 vs. saline (ctrl), #P<0.05, ##P<0.01 vs. 0.05µg/mL and \$P<0.05 vs. 0.5µg/mL pravastatin, n=6. **B, D** Capillary tube formation in the presence of simvastatin. \*\*P<0.01, \*\*\*P<0.001 vs. DMSO, ###P<0.001 vs. 0.05µg/mL and \$\$\$P<0.001 vs. 0.5µg/mL simvastatin, n=6. Scale bars indicate 200µm. Mean±SD, data analysis by ANOVA/Bonferroni.

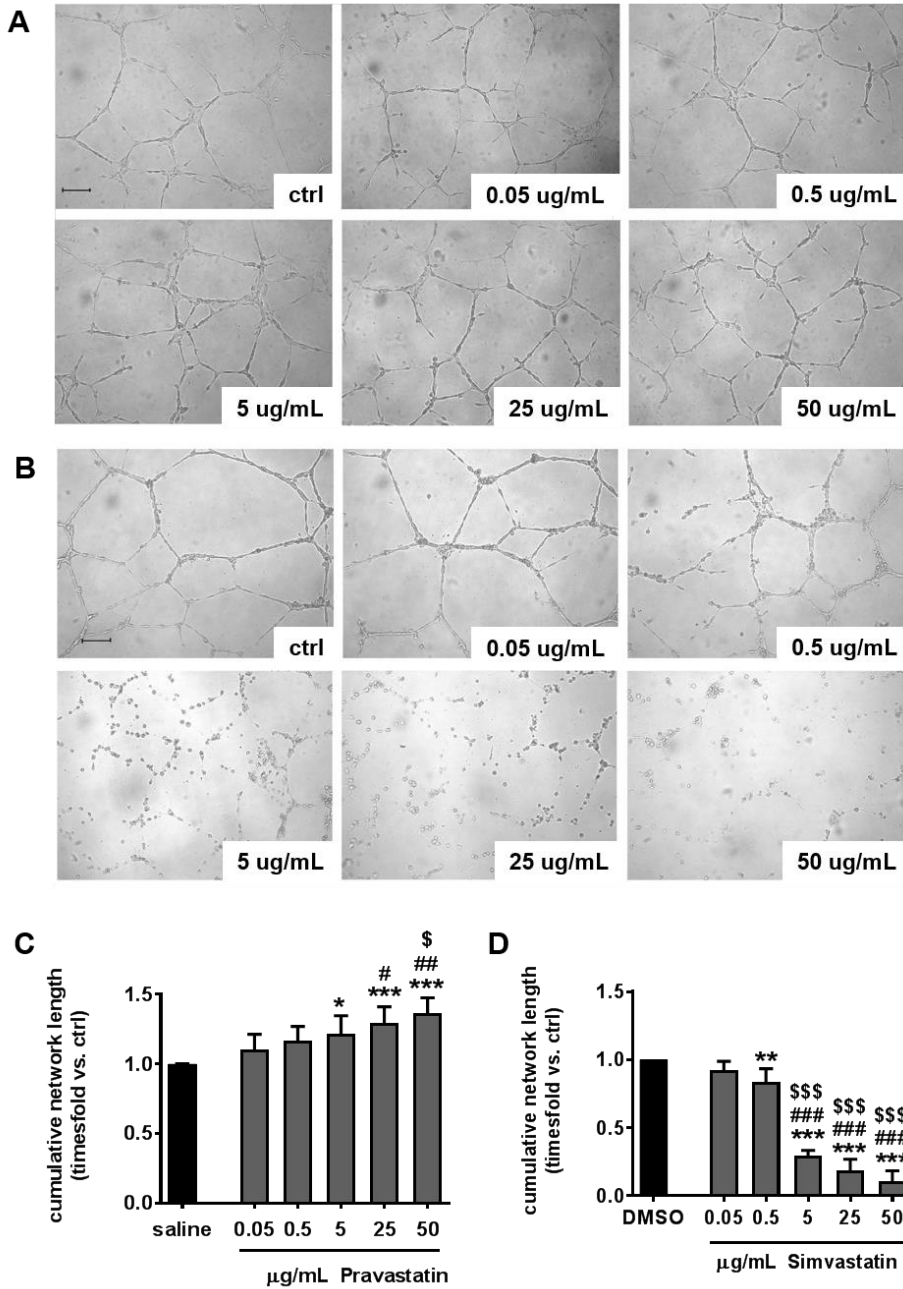

**Supplemental Table 1****Physiological and experimental parameters of resuscitation**

|                                                    | CA/CPR 10 min |             | CA/CPR 10 min |                |
|----------------------------------------------------|---------------|-------------|---------------|----------------|
|                                                    | normal saline | pravastatin | simvastatin   | lipid emulsion |
|                                                    | n = 31        | n = 31      | n = 30        | n = 32         |
| <b><u>Baseline (preparation) before CA/CPR</u></b> |               |             |               |                |
| bodyweight [g]                                     | 22.65 [±2.2]  | 21.8 [±2.0] | 20.19 [±2.1]  | 20.76 [±1.7]   |
| heart rate [1/min]                                 | 245 [±27]     | 238 [±31]   | 219 [±27]     | 226 [±30]      |
| MAP [mm Hg]                                        | 103 [±10]     | 105 [±12]   | 85 [±12]      | 84 [±12]       |
| body temperature [°C]                              | 36.0 [±0.1]   | 36.0 [±0.1] | 35.9 [±0.1]   | 35.9 [±0.1]    |
| <b><u>Parameter of CA/CPR</u></b>                  |               |             |               |                |
| ROSC time [s]                                      | 87 [±25]      | 70 [±25]    | 71 [±28]      | 68 [±19]       |
| ROSC rate [%]                                      | 100           | 100         | 100           | 100            |
| Epinephrine [µg]                                   | 15 [±5]       | 15 [±5]     | 12.5 [±5]     | 12.5 [±2.5]    |
| Weaning [min]                                      | 138 [±12]     | 133 [±8]    | 156 [±21]     | 145 [±15]      |
| <b><u>1 hour after CA/CPR</u></b>                  |               |             |               |                |
| heart rate [1 / min]                               | 440 [±33]     | 430 [±28]   | 378 [±49]     | 383 [±48]      |
| MAP [mm Hg]                                        | 75 [±10]      | 80 [±12]    | 65 [±8]       | 63 [±9]        |
| body temperature [°C]                              | 36.3 [±0.2]   | 36.4 [±0.1] | 36.2 [±0.3]   | 36.2 [±0.2]    |
| <b><u>2 hours after CA/CPR</u></b>                 |               |             |               |                |
| heart rate [1 / min]                               | 320 [±40]     | 305 [±37]   | 290 [±53]     | 283 [±49]      |
| MAP [mm Hg]                                        | 65 [±7.5]     | 65 [±8]     | 61 [±6]       | 58 [±6]        |
| body temperature [°C]                              | 36.0 [±0.1]   | 36.0 [±0.1] | 36.0 [±0.1]   | 36.0 [±0.2]    |

## Supplemental Table 2

### Results of the NeuroScore

| (max. 12 Points) | saline     | pravastatin | simvastatin | lipid emulsion |
|------------------|------------|-------------|-------------|----------------|
|                  | n=31       | n=30        | n=30        | n=32           |
| day 0            | 12[12-12]  | 12[12-12]   | 12[12-12]   | 12[12-12]      |
| day 1            | 11[9.5-12] | 11.5[10-12] | 10[8.25-10] | 10[8-11]       |
| day 2            | 12[10-12]  | 12 [10-12]  | 10[10-11]   | 10[9.75-12]    |
| day 3            | 12[11-12]  | 12[12-12]   | 11[10-12]   | 12[9-12]       |
| day 5            | 12[12-12]  | 12[12-12]   | 12[11-12]   | 12[12-12]      |

## Supplemental Table 3

### Results of the RotaRod test

| (time[sec]) | saline       | pravastatin   | simvastatin  | lipid emulsion |
|-------------|--------------|---------------|--------------|----------------|
|             | n=31         | n=30          | n=30         | n=32           |
| day0        | 851[671-900] | 900[682-900]  | 900[845-900] | 900[812-900]   |
| day1        | 38[5-620]    | 41[9-385]     | 22[7-99]     | 15[7-190]      |
| day2        | 391[98-598]  | 303[16-696]   | 67[13-209]   | 56[8-363]      |
| day3        | 401[138-734] | 664[231-881]  | 236[31-384]  | 489[34-737]    |
| day4        | 610[227-900] | 900[723-900]* | 312[125-589] | 351[152-605]   |
| day5        | 810[578-894] | 900[696-900]* | 531[225-781] | 657[580-834]   |

\*P<0.05 vs. saline. Median and [25-75] percentiles, Mann-Whitney U-test.

## Supplemental Table 4

### Blood gas analysis 8 hours after CA/CPR

|                                        | saline       | pravastatin    | simvastatin  | lipid emulsion |
|----------------------------------------|--------------|----------------|--------------|----------------|
|                                        | n=31         | n=31           | n=30         | n=32           |
| p <sub>a</sub> O <sub>2</sub> [mm Hg]  | 104.1[±3.9]  | 138.3[±12.1]*  | 107.1[±6.7]  | 111.8[±5.2]    |
| Horowitz-ratio                         | 495.9[±18.6] | 658.5[±57.6] * | 509.9[±31.7] | 532.3[±24.7]   |
| p <sub>a</sub> CO <sub>2</sub> [mm Hg] | 46.6[±1.4]   | 43.3[±1.8]     | 39.6[±2.2]   | 42.1[±1.1]     |
| pH                                     | 7.30[±0.02]  | 7.30[±0.06]    | 7.32[±0.04]  | 7.33[±0.04]    |
| HCO <sub>3</sub> <sup>-</sup> [mmol/L] | 21.9[±0.9]   | 20.6[±2.8]     | 22.5[±1.4]   | 21.7[±1.5]     |
| Base excess[mmo/L]                     | -3.8[±1.3]   | -6.3[±4.1]     | -2.4[±1.9]   | -4.3[±2.3]     |
| K <sup>+</sup> [mmol/L]                | 3.8[±0.1]    | 4.3[±0.2]      | 4.1[±0.1]    | 4.0[±0.2]      |

\*P<0.05 vs. saline. Mean ± SD, data analysis by ANOVA/Bonferroni
